# Supplementary material
Source: PubMed Central journal article supplement (PMC3241964)
Supplement: NIHMS325614-supplement-01.pdf [file NIHMS325614-supplement-01.pdf]

# **Advances in multiphoton microscopy for imaging embryos**

Willy Supatto, Thai V Truong, Delphine Debarre and Emmanuel Beaurepaire

## **Supplementary Material**

### **Supplementary Table 1.**

**Strategies for fast imaging speed in multiphoton microscopy vs linear microscopy: theoretical scaling of illumination parameters.**

SUPPLEMENTARY TABLE 1

|                                                       | Point-scanning<br>2p-microscopy                                                   |     | Fast point-<br>scanning<br>2p-microscopy<br>( $N$ -time faster<br>scan)           |                 | Multifocal<br>multiphoton<br>microscopy<br>( $N$ foci)                             |      | Light-sheet<br>2p-microscopy                                                        |                               |
|-------------------------------------------------------|-----------------------------------------------------------------------------------|-----|-----------------------------------------------------------------------------------|-----------------|------------------------------------------------------------------------------------|------|-------------------------------------------------------------------------------------|-------------------------------|
| Scanning<br>scheme                                    | 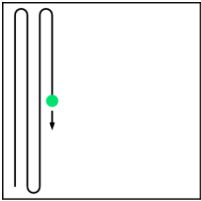 |     |  |                 |  |      |  |                               |
|                                                       | Point<br>scanning                                                                 |     | Fast point<br>scanning                                                            |                 | Multiple point<br>scanning                                                         |      | Fast line<br>scanning                                                               |                               |
| Fluorescence<br>excitation<br>mode                    | 1p                                                                                | 2p  | 1p                                                                                | 2p              | 1p                                                                                 | 2p   | 1p                                                                                  | 2p                            |
| Acquisition<br>speed (pixel<br>rate)                  | $r$                                                                               | $r$ | $Nr$                                                                              | $Nr$            | $Nr$                                                                               | $Nr$ | $Nr$                                                                                | $Nr$                          |
| Numerical<br>aperture of<br>illumination<br>objective | NA                                                                                | NA  | NA                                                                                | NA              | NA                                                                                 | NA   | $\frac{1}{\alpha}$ NA                                                               | $\frac{1}{\alpha}$ NA         |
| Illumination<br>time per<br>excited<br>volume         | $t$                                                                               | $t$ | $\frac{1}{N} t$                                                                   | $\frac{1}{N} t$ | $t$                                                                                | $t$  | $\frac{\alpha^2}{N} t$                                                              | $\frac{\alpha^4}{N} t$        |
| Illumination<br>laser intensity<br>per focus          | $I$                                                                               | $I$ | $NI$                                                                              | $\sqrt{N} I$    | $I$                                                                                | $I$  | $\frac{N}{\alpha^2} I$                                                              | $\frac{\sqrt{N}}{\alpha^2} I$ |
| Illumination<br>laser average<br>power                | $P$                                                                               | $P$ | $NP$                                                                              | $\sqrt{N} P$    | $NP$                                                                               | $NP$ | $NP$                                                                                | $\sqrt{N} P$                  |

**Supplementary Table 1. Strategies for fast imaging speed in multiphoton microscopy vs linear microscopy: theoretical scaling of illumination parameters.** This table completes Table 1 with parameter scaling in the cases of 1p-microscopy techniques (see Table 1 caption for explanations). It shows that in linear microscopy, increasing the speed  $N$ -times always requires  $N$ -fold increase in laser

power to obtain images with the same signal level. In nonlinear microscopy, the square root of laser power is sufficient, except in the case of multifocal approach.
